# Supplementary material for: Heterogeneous reactions of NO 2 with CaCO 3 -(NH 4 ) 2 SO 4 mixtures at different relative humidities
Source: Copernicus journal article supplement (doi:10.5194/acp-2016-85), 2016-03-29
Supplement: Supplementary file [file acp-2016-85-AC2-supplement.pdf]

## Response

### Response to referee:

We are grateful to Referee #1 for the comments and the constructive suggestions to improve our manuscript. Our response to the comments and changes to the manuscript are included below. We repeat the specific points raised by the reviewer in bold font, followed by our response in italic font. The pages numbers and lines mentioned below are consistent with those in the Atmospheric Chemistry and Physics Discussions (ACPD) paper.

**Mineral dust and sulfate are common components in atmospheric particulate matters (PMs), and their coagulation in the atmosphere can form new types of PMs whose physical and chemical characters will be altered, thus affecting on atmospheric physical and chemical processes. Because only few studies investigated the heterogeneous reactions under complex conditions, there is still large gap to explain many phenomena of field measurements by using the current knowledge of atmospheric chemistry. The new finding in this study about the heterogeneous reactions of NO<sub>2</sub> on the surface of CaCO<sub>3</sub>-(NH<sub>4</sub>)<sub>2</sub>SO<sub>4</sub> mixtures provided important information, that is, the heterogeneous reactions in the atmosphere may play important role on formation of nitrate, CaSO<sub>4</sub> 0.5H<sub>2</sub>O (bassanite), CaSO<sub>4</sub> 2H<sub>2</sub>O (gypsum) and (NH<sub>4</sub>)<sub>2</sub>Ca(SO<sub>4</sub>)<sub>2</sub> H<sub>2</sub>O (koktaite). This reviewer recommends the manuscript be published in the journal after considering the following one specific: The formation rates of nitrate based on the integrated absorbance of the IR peak area between 1390 and 1250 cm<sup>-1</sup> are inconsistent with the final concentrations of nitrate measured by IC. The intensity of the IR absorbance in the DRIFTS can only reveal the surface concentration of nitrate, whereas the nitrate concentrations measured by IC are the bulk concentrations in the PMs. The surface nitrate formed through the heterogeneous reactions was suspected to easily diffuse into inner layer of the PMs under high RH conditions. The authors should present the explanations.**

**Reply:** Thanks for the reviewer's comment. We agree with the reviewer's point that the infrared beam primarily interrogates the upper portion of the particulate samples and IR absorbance in the DRIFTS reveals the surface concentration of nitrate. The infrared beam is, however, not restricted solely to the top few particle layers (Vogt and Finlaysonpitts, 1994). In fact, DRIFTS has been applied extensively to study the kinetics and mechanisms of gas-solid reactions (Ullerstam et al., 2002, 2003; Li et al., 2007; Li et al., 2010; Tong et al. 2010), where the kinetics of the reactions are followed using the integrated absorbance-reaction time behavior and the reactive uptake coefficient ( $\gamma$ ) is determined from the infrared absorbance, that calibrated by ion chromatography (IC).

Vogt et al. (1994) investigated the depth of the pellet from which the infrared signal generated. They mixed homogeneous  $\text{NaNO}_3$  or  $\text{NaCl}$  mixture with an additional 0.2-0.5mm layers of neat  $\text{NaCl}$  powder on top and found that significant signals could still be observed. Also they reported that the absorbance integrated over the  $\nu_3$  region was linearly dependent on the amount of nitrate determined by IC in the reaction of solid  $\text{NaCl}$  with gaseous  $\text{NO}_2$  and  $\text{HNO}_3$ . In this study, as indicated in Figure S3 that over a large concentration range the integrated nitrate absorbance over the  $\nu_3$  region (1390 to 1250  $\text{cm}^{-1}$ ) was proportional to the nitrate ions concentration detected by IC. In another word, the reacted particles were within the depth that infrared signal generated and the nitrate formed during the reaction could be presented by the integrated absorbance over the  $\nu_3$  region.

Li et al. (2010) investigated the heterogeneous reaction of  $\text{CaCO}_3$  with  $\text{NO}_2$  using a DRIFTS reactor and found that there was a linear relationship between absorbance integrated over the  $\nu_1$  region (1013-1073  $\text{cm}^{-1}$ ) and the number of nitrate ions determined by IC. They reported that the conversion factor  $f$  (in the equation of the nitrate ions  $\{\text{NO}_3^-\} = (\text{integrated absorbance } I_A) \times f$ ) was found to be independent of reaction time and  $\text{NO}_2$  concentration as long as the experiment was completed at a stage when the absorption of the nitrate band was still growing. In this research, we found that the integrated nitrate absorbance over the  $\nu_1$  region (1013-1073  $\text{cm}^{-1}$ ) and the  $\nu_3$  region (1250-1390  $\text{cm}^{-1}$ ) could well overlap after the former multiplied by a

constant (see in Figure S2). And all the experiments in our study were completed as the integrated nitrate absorptions were still growing (Figure 3).

Therefore the nitrate formation rates based on the integrated absorbance of the IR peak area between 1390-1250 were well consistent with the nitrate concentrations measured by IC.

Following the referee's suggestion, we added a series of experiments that stopped the heterogeneous reactions of  $\text{NO}_2$  with  $\text{CaCO}_3$  and  $\text{CaCO}_3\text{-(NH}_4)_2\text{SO}_4$  mixtures at the initial stage (e.g. 20min, 30min, and 40min) under wet and dry conditions. The results indicated that the integrated absorbance of nitrate has a linear relationship with the amount of nitrate determined by ion chromatography during all the reaction periods. Some modifications have been made in Figure S3 after some data added to the calibration plot. Figure S2 was added to illustrate that the integrated nitrate absorbance over the  $\nu_1$  region ( $1013\text{-}1073\text{ cm}^{-1}$ ) and the  $\nu_3$  region ( $1250\text{-}1390\text{ cm}^{-1}$ ) could well overlap after the former multiplied by a constant.

**Related changes included in the revised manuscript:**

Page 10 line 24, after the sentence "... interruption of the absorptions of sulfates" we added "The integrated nitrate absorbance over the  $\nu_1$  region ( $1013\text{-}1073\text{ cm}^{-1}$ ) and the  $\nu_3$  region ( $1250\text{-}1390\text{ cm}^{-1}$ ) could well overlap after the former multiplied by a constant (Figure S2)."

Page 11 line 12, we revised "Fig. S2" in the sentence "... at 60%, 40% RH and dry condition (see Fig. S2)." to Fig S3.

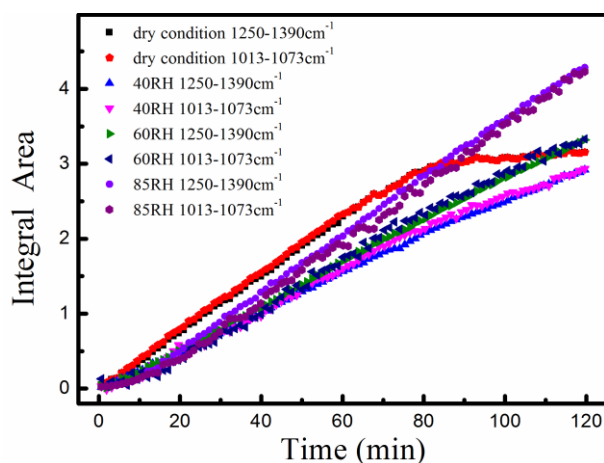

**Figure S2:** The integrated nitrate absorbance over the  $\nu_1$  region ( $1013\text{-}1073\text{ cm}^{-1}$ ) and the  $\nu_3$  region ( $1250\text{-}1390\text{ cm}^{-1}$ ) after the  $\nu_1$  region multiplied by 3, 7, 10, 12 under dry condition, 40% RH, 60% RH, and 85% RH, respectively, for the reaction of  $\text{NO}_2$  with  $\text{CaCO}_3$  particles.

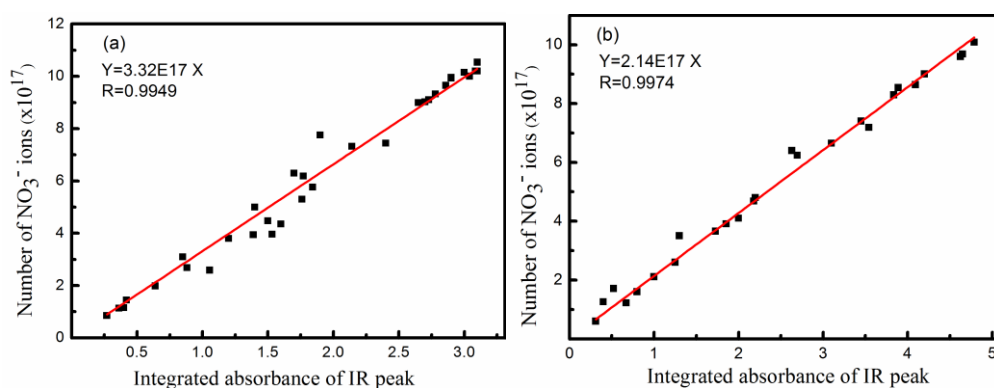

**Figure S3.** The number of  $\text{NO}_3^-$  ions detected by IC as a function of integrated absorbance of IR peak between  $1390$  and  $1250\text{ cm}^{-1}$  at (a) dry condition, 40% RH, and 60% RH, (b) 85% RH.

#### References:

- Li, H. J., Zhu, T., Zhao, D. F., Zhang, Z. F., and Chen, Z. M. : Kinetics and mechanisms of heterogeneous reaction of  $\text{NO}_2$  on  $\text{CaCO}_3$  surfaces under dry and wet conditions, *Atmos. Chem. Phys.*, 10, 463–474, 2010.
- Li, L., Chen, Z. M., Zhang, Y. H., Zhu, T., Li, S., Li, H. J., Zhu, L. H., and Xu, B. Y.: Heterogeneous oxidation of sulfur dioxide by ozone on the surface of sodium chloride and its mixtures with other components, *J. Geophys. Res.-Atmos.*, 112, doi:10.1029/2006jd008207, 2007.
- Li, L., Chen, Z. M., Zhang, Y. H., Zhu, T., Li, J. L., and Ding, J.: Kinetics and mechanism of heterogeneous oxidation of sulfur dioxide by ozone on surface of calcium carbonate, *Atmos. Chem. Phys.*, 6, 2453–2464, 2006.
- Liu, Y. J., Zhu, T., Zhao, D. F., and Zhang, Z. F.: Investigation of the hygroscopic properties of  $\text{Ca}(\text{NO}_3)_2$  and internally mixed  $\text{Ca}(\text{NO}_3)_2/\text{CaCO}_3$  particles by micro-Raman spectrometry, *Atmos. Chem. Phys.*, 8, 7205–7215, 2008.

Tang, I. N., and Fung, K. H.: Hydration and Raman scattering studies of levitated microparticles:  $Ba(NO_3)_2$ ,  $Sr(NO_3)_2$ , and  $Ca(NO_3)_2$ , *J. Chem. Phys.*, 106, 1653-1660, doi:10.1063/1.473318, 1997.

Tong, S. R., Wu, L. Y., Ge, M. F., Wang, W. G., and Pu, Z. F.: Heterogeneous chemistry of monocarboxylic acids on  $\alpha-Al_2O_3$  at different relative humidities, *Atmos. Chem. Phys.*, 10, 7561-7574, doi:10.5194/acp-10-7561-2010, 2010.

Ullerstam, M., Vogt, R., Langer, S., and Ljungstrom, E.: The kinetics and mechanism of  $SO_2$  oxidation by  $O_3$  on mineral dust, *Phys. Chem. Chem. Phys.*, 4, 4694-4699, doi:10.1039/b203529b, 2002.

Ullerstam, M., Johnson, M. S., Vogt, R., and Ljungstrom, E.: DRIFTS and Knudsen cell study of the heterogeneous reactivity of  $SO_2$  and  $NO_2$  on mineral dust, *Atmos. Chem. Phys.*, 3, 2043-2051, 2003.

Vogt, R., and Finlaysonpitts, B. J.: A Diffuse Reflectance Infrared Fourier-Transform Spectroscopic (DRIFTS) study of the surface-reaction of NaCl with gaseous  $NO_2$  and  $HNO_3$ , *J. Phys. Chem.*, 98, 3747-3755, doi:10.1021/j100065a033, 1994.

Wu, L. Y., Tong, S. R., and Ge, M. F.: Heterogeneous reaction of  $NO_2$  on  $Al_2O_3$ : the effect of temperature on the nitrite and nitrate formation, *J. Phys. Chem. A*, 117, 4937-4944, doi:10.1021/jp402773c, 2013.
